# Supplementary material for: Autophagy Deficiency in Renal Proximal Tubular Cells Leads to an Increase in Cellular Injury and Apoptosis under Normal Fed Conditions
Source: PubMed Central journal article supplement (PMC6982095; doi:10.3390/ijms21010155), 2019-12-25
Supplement: ijms-21-00155-s001.pdf [file ijms-21-00155-s001.pdf]

## Supplementary Materials:

# Autophagy Deficiency in Renal Proximal Tubular Cells Leads to an Increase in Cellular Injury and Apoptosis under Normal Fed Conditions

Chigure Suzuki <sup>1,2</sup>, Isei Tanida <sup>1,\*</sup>, Juan Alejandro Oliva Trejo <sup>1</sup>, Soichiro Kakuta <sup>1,3</sup> and Yasuo Uchiyama <sup>1,\*</sup>

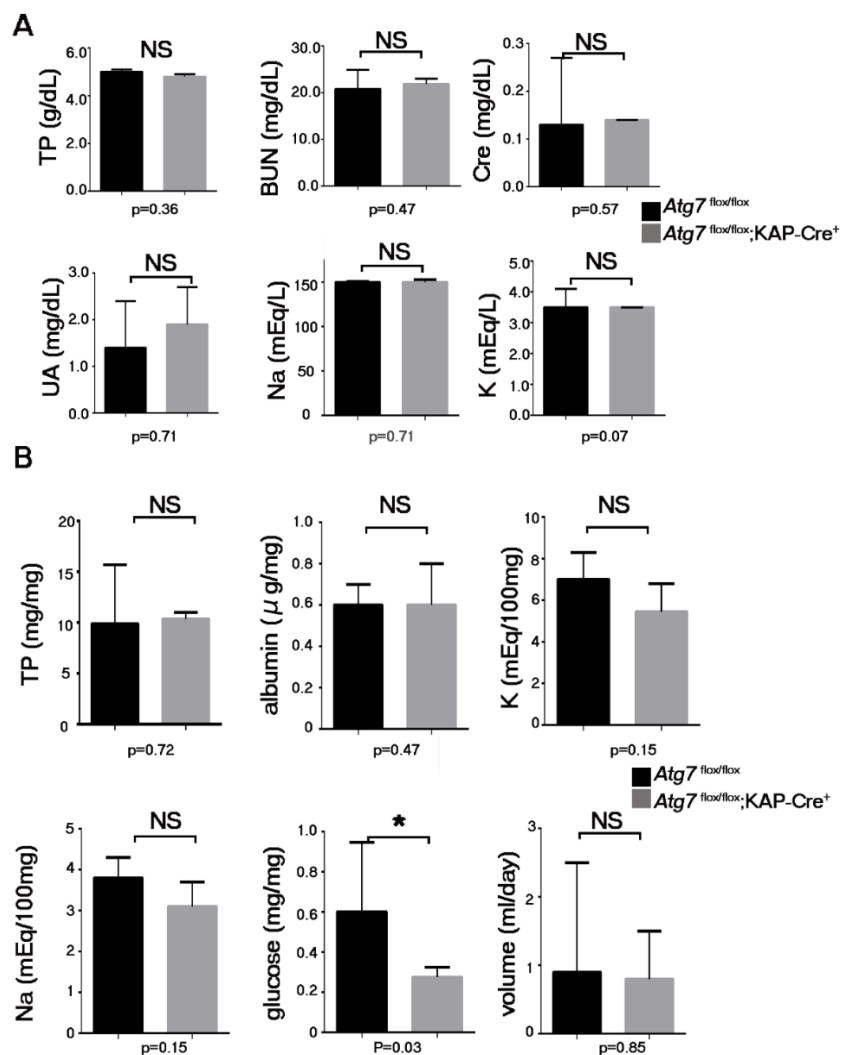

**Figure S1.** *Atg7<sup>flox/flox</sup>;KAP-Cre<sup>+</sup>* mice had no overt abnormality in the blood and urine exams for renal function. (A) Blood analysis data of 6 months old *Atg7<sup>flox/flox</sup>* and *Atg7<sup>flox/flox</sup>;KAP-Cre<sup>+</sup>* mice. TP: Total protein, BUN: urea nitrogen, Cre: creatinine, UA: uric acid, Na: sodium, K: potassium. *N* = 3 to 4 mice. (B) 24 hours urinary data of Total Protein (TP), albumin, potassium (K), sodium (Na) glucose, and urine volume. TP, albumin, K, Na describe as ratio of urinary

creatinine.  $N = 4$  mice. Data in graphs are expressed as the median  $\pm$  SEM. Statistical analyses were performed using Statistical analyses were performed using a python software with scipy.stats module. Data in the graph are expressed as the median  $\pm$  RANGE, and statistical significance was set at  $p < 0.05$ . NS: no significant difference.

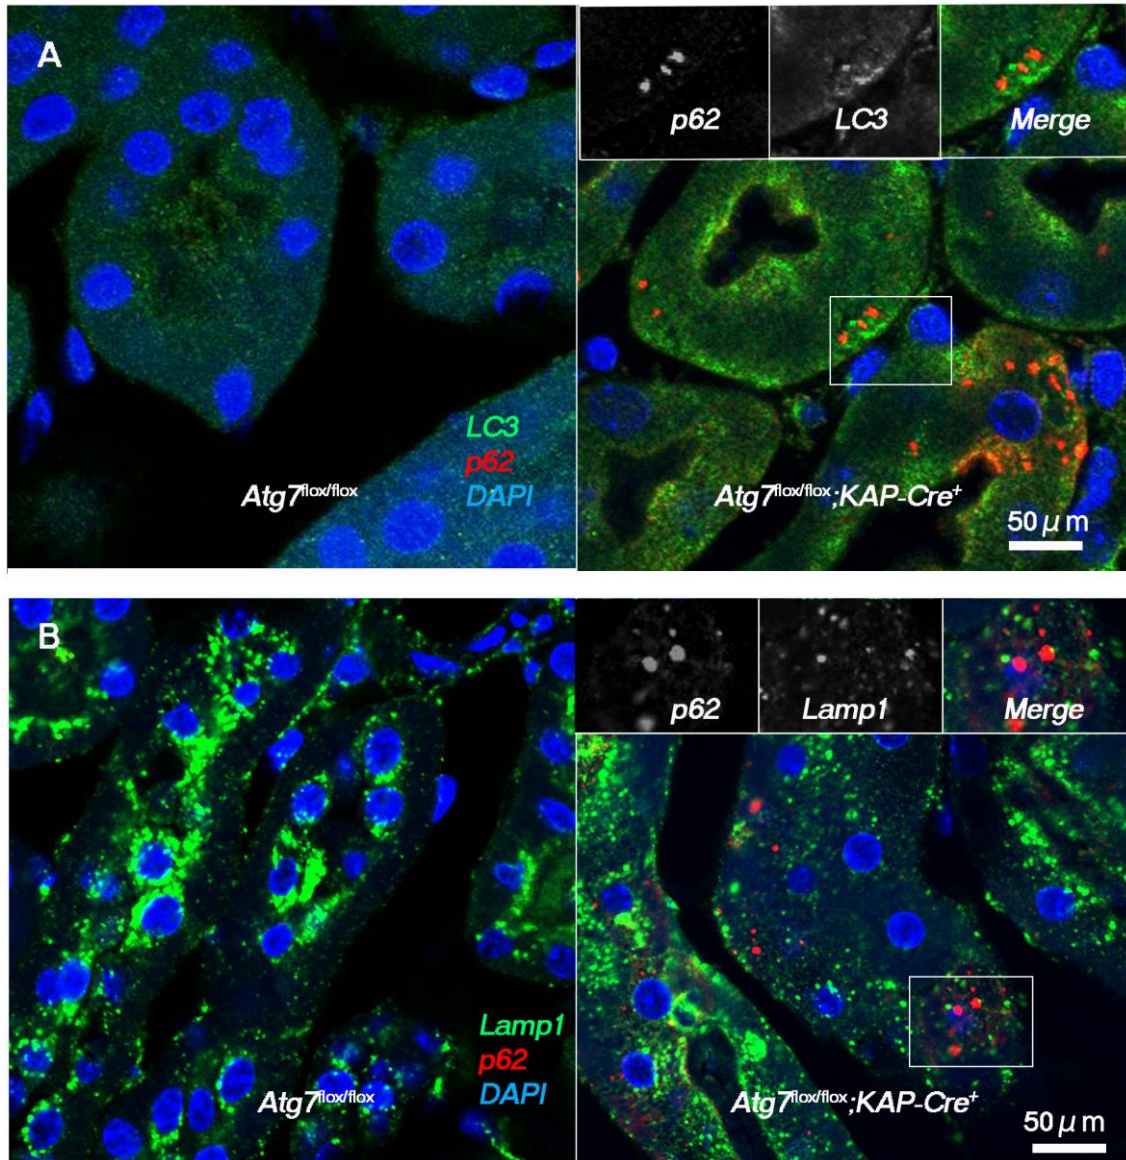

**Figure S2. Autophagy flux was impaired in renal tubular cells of *Atg7<sup>flox/flox</sup>;KAP-Cre<sup>+</sup>* mice.** Representative images of the proximal region of the kidney of *Atg7<sup>flox/flox</sup>;KAP-Cre<sup>+</sup>* mice (left panels) and *Atg7<sup>flox/flox</sup>* mice (right panels) stained with: (A) LC3 (green) and p62 (red). Nuclei were stained with DAPI (blue). (B) Lamp1 (green) and p62 (red). Nuclei were stained with DAPI (blue).

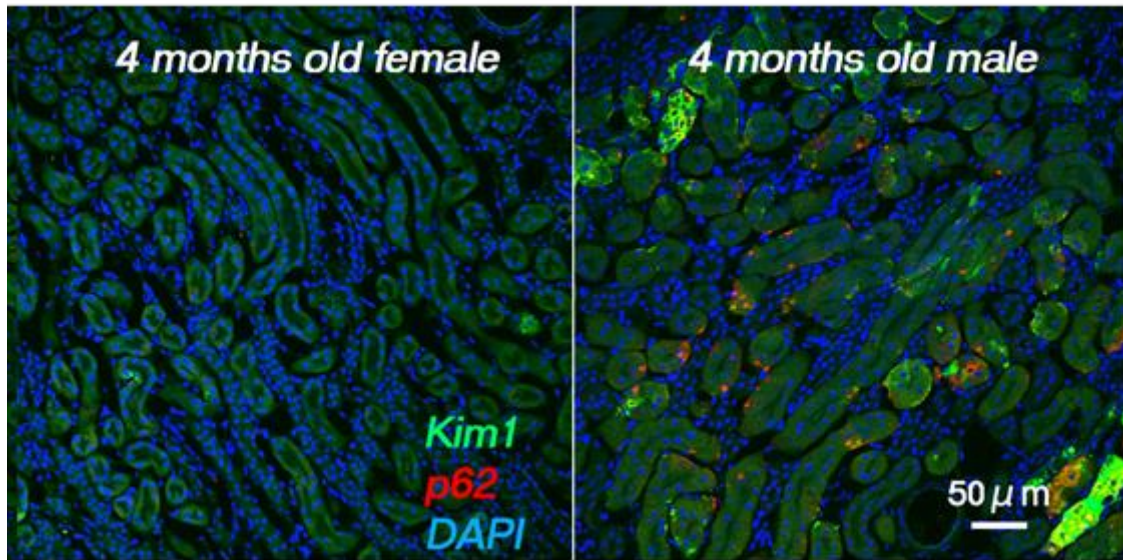

Figure S3. Female *Atg7<sup>flox/flox</sup>;KAP-Cre<sup>+</sup>* mice had no accumulation of p62 and increment of Kim1 positive immunosignals in their proximal tubular cells. Representative images of kidney samples of 4 months old female (left) and male (right) *Atg7<sup>flox/flox</sup>;KAP-Cre<sup>+</sup>* mice stained with Kim-1 (green) and p62 (red). Nuclei were stained with DAPI (blue).
